# Supplementary material for: A single-cell analysis of thymopoiesis and thymic iNKT cell development in pigs
Source: PubMed Central journal article supplement — Cell Rep. Author manuscript; Available in PMC 2022 Nov 28. (PMC9704770; doi:10.1016/j.celrep.2022.111050), 2022-07-05
Supplement: NIHMS1821579-supplement-1.pdf [file NIHMS1821579-supplement-1.pdf]

**Cell Reports, Volume 40**

**Supplemental information**

**A single-cell analysis of thymopoiesis  
and thymic iNKT cell development in pigs**

**Weihong Gu, Darling Melany C. Madrid, Sebastian Joyce, and John P. Driver**

## Supplemental materials

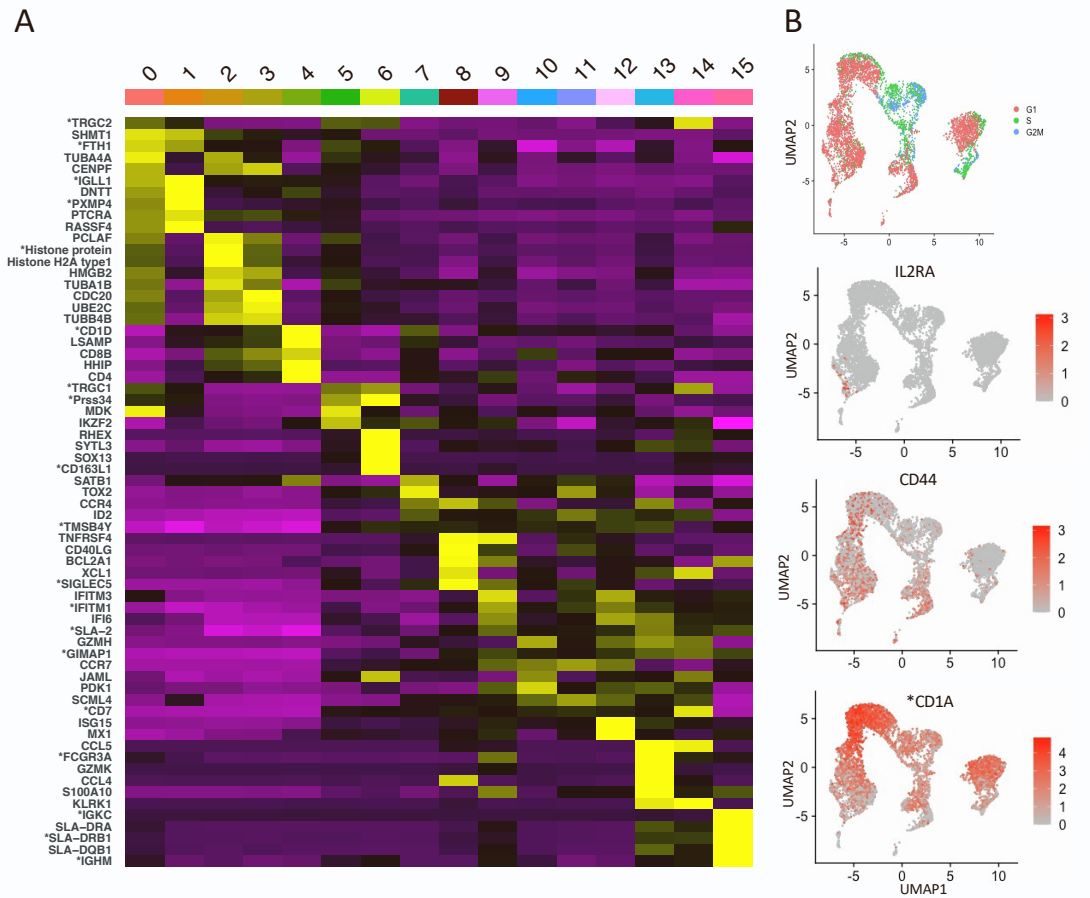

**Figure S1. The transcriptional profile of pig thymocytes, related to Figure 1. (A)** Heatmap showing row-scaled mean expression of the five most differentially expressed genes per cluster (clusters from Figure 1A). **(B)** UMAP plot showing cell cycling phases in pig thymocytes. The same UMAP plot is used to show cells with high expression of *IL2RA*, *CD44*, and *\*CD1A*. Asterisks indicate non-annotated genes (described in Table S13).

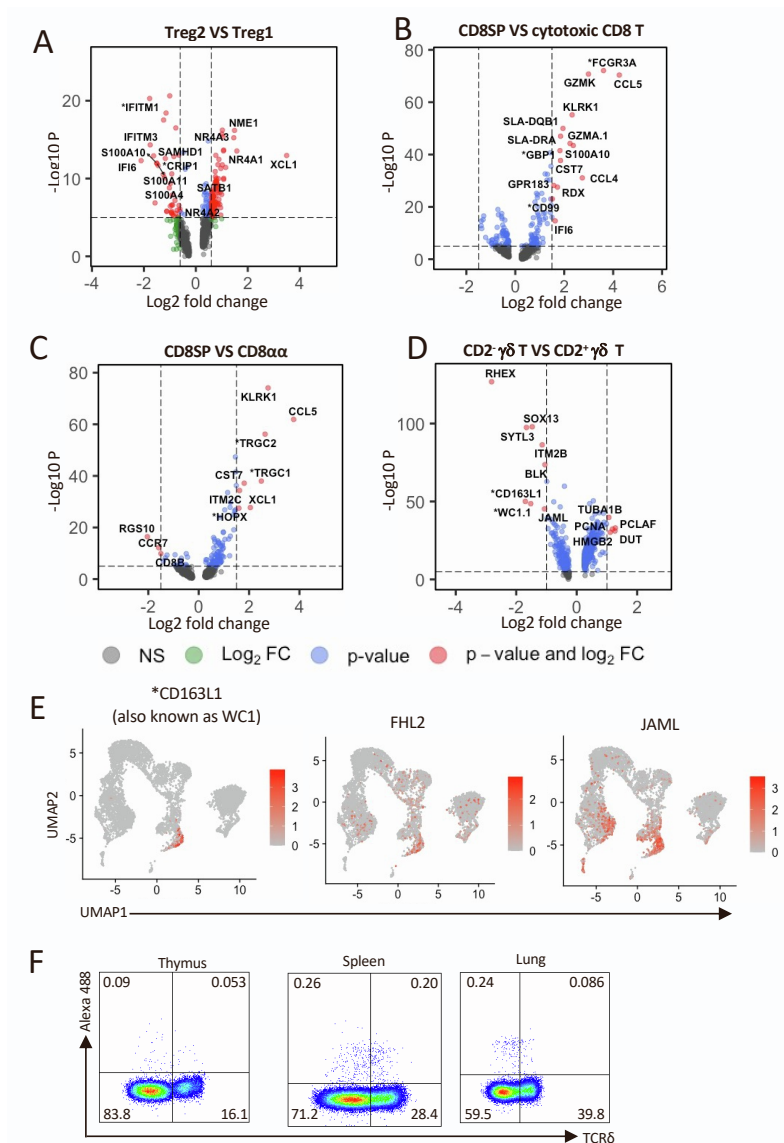

**Figure S2. Analysis of differentially expressed genes in unconventional T cells, related to Figure 2. (A-D)** Volcano plots showing differentially expressed genes between Treg2 cells and Treg1 cells (A), CD8SP cells and cytotoxic CD8 T cells (B), CD8SP cells and CD8 $\alpha$  T cells (C), and CD2 $^{-}$  $\gamma\delta$  T cells and CD2 $^{+}$  $\gamma\delta$  T cells (D). The x-axis and y-axis respectively represent log<sub>2</sub>(fold change) and -log<sub>10</sub>(p-value). (E) UMAP plot showing the expression pattern of selected marker genes associated with CD2 $^{-}$  $\gamma\delta$  T cells. (F) No primary antibody controls for JAML staining. Thymocytes, splenocytes, and lung leukocytes were membrane labeled with antibodies against CD3, TCR1  $\delta$  chain, and rabbit IgG, and analyzed according to the Method Details. Asterisks indicate non-annotated genes (described in Table S13).

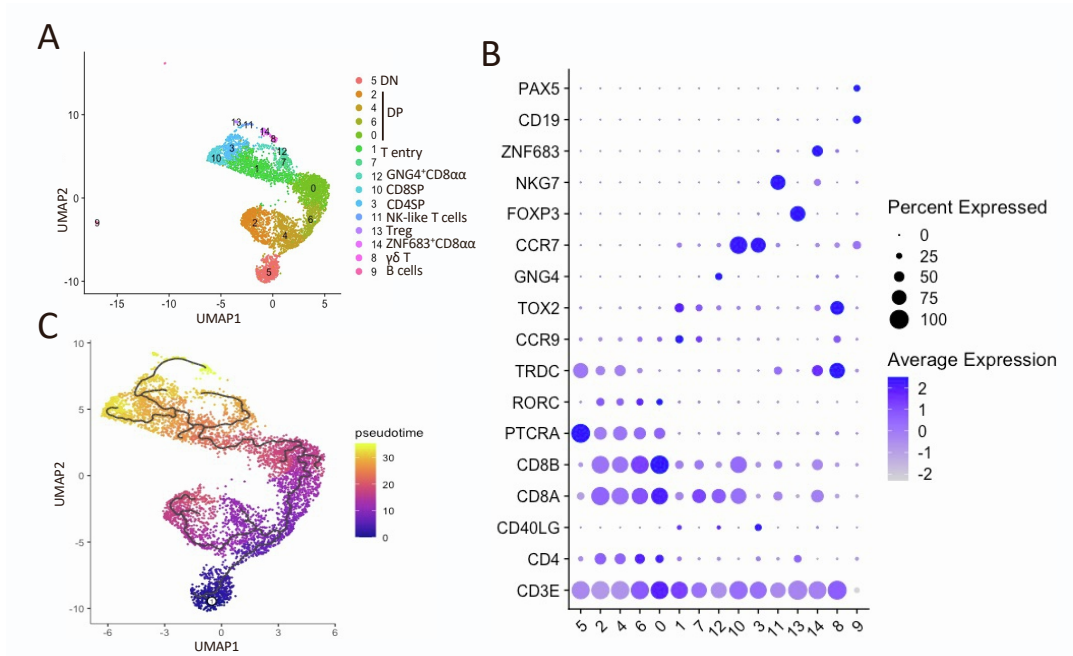

**Figure S3. scRNA-seq analysis of human thymocytes, related to Figure 4. (A)** UMAP plot of human CD34<sup>+</sup> thymocytes from the original public dataset (Le et al., 2020). **(B)** Dot plot showing the Z-scored mean expression of selected marker genes in clusters from (A). **(C)** Pseudotime trajectory of human thymocyte development created in Monocle 3 using clusters from (A), excluding  $\gamma\delta$  T cells and B cells.

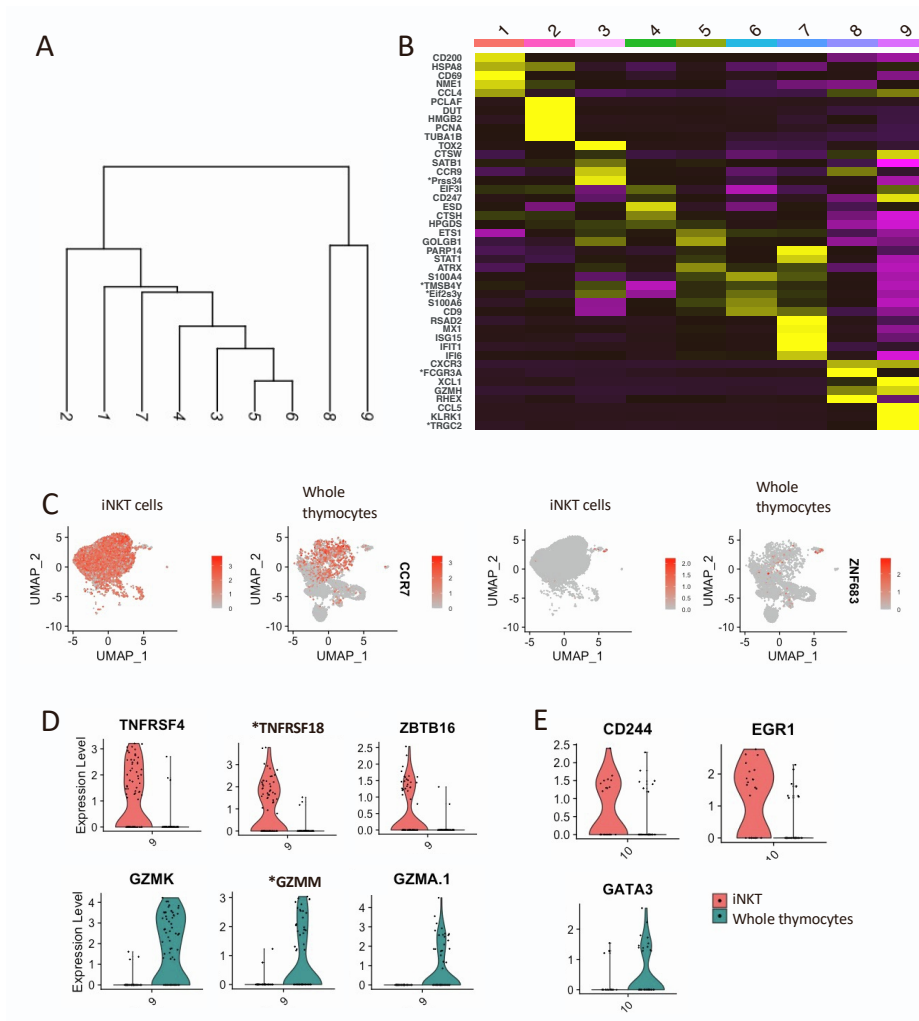

**Figure S4. Transcriptional profile of pig iNKT cells and integrative analysis between iNKT cells and whole thymocytes, related to Figure 5. (A)** Dendrogram showing similarities among iNKT cell clusters. **(B)** Heatmap showing row-scaled mean expression of the five most differentially expressed genes per cluster (clusters from Figure 5B). **(C)** UMAP plots showing pig iNKT cells and whole thymocytes (from integrative data in Figure 5E) with high expression of *CCR7* and *ZNF683*. **(D-E)** Violin plots showing expression of selected genes that are differentially expressed between iNKT-sw1 and cytotoxic CD8 T cells (cluster 9 in Figure 5E) **(D)**, and between iNKT-sw2 and CD8 $\alpha$  T cells (cluster 10 in Figure 5E) **(E)**. Asterisks indicate non-annotated genes (described in Table S13).

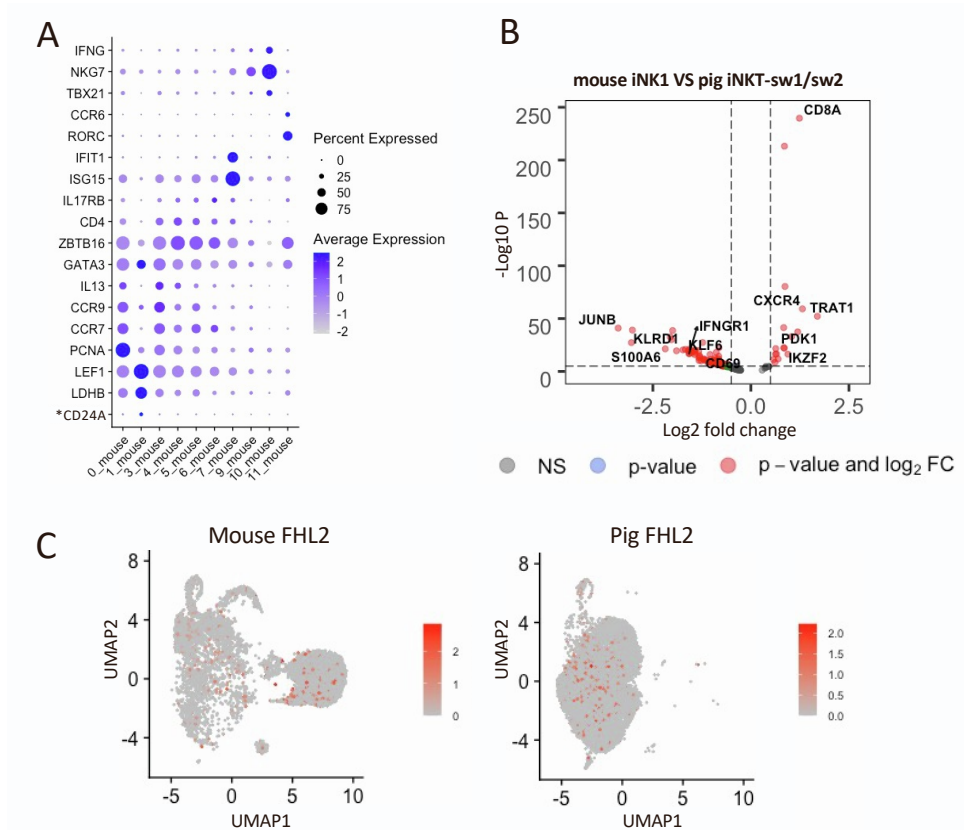

**Figure S5. Comparisons of gene expression between mouse and pig iNKT cells, related to Figure 6. (A)** Dot plot showing the Z-scored mean expression of selected marker genes in mouse iNKT cell clusters displayed in Figure 6A. **(B)** Volcano plot (from Figure 6A) showing differentially expressed genes between mouse iNKT1 cells (clusters 9 and 10 combined) and pig iNKT-sw1/sw2 cells (cluster 8) from Figure 6A. **(C)** UMAP showing the expression of *FHL2* in mouse and pig iNKT cell clusters displayed in Figure 6A. Asterisks indicate non-annotated genes (described in Table S13).

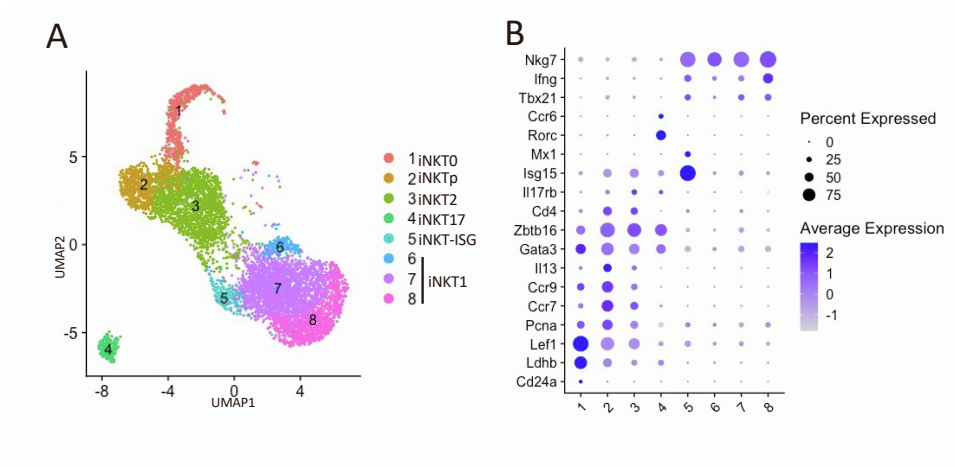

**Figure S6. scRNA-seq analysis of mouse iNKT cells, related to Figure 7. (A)** UMAP plot of murine iNKT cells from the original public dataset (Harsha Krovi et al., 2020). Corresponds to the mouse dataset used to generate Figure 7. **(B)** Dot plot showing the Z-scored mean expression of selected marker genes in mouse iNKT cell clusters displayed in A.

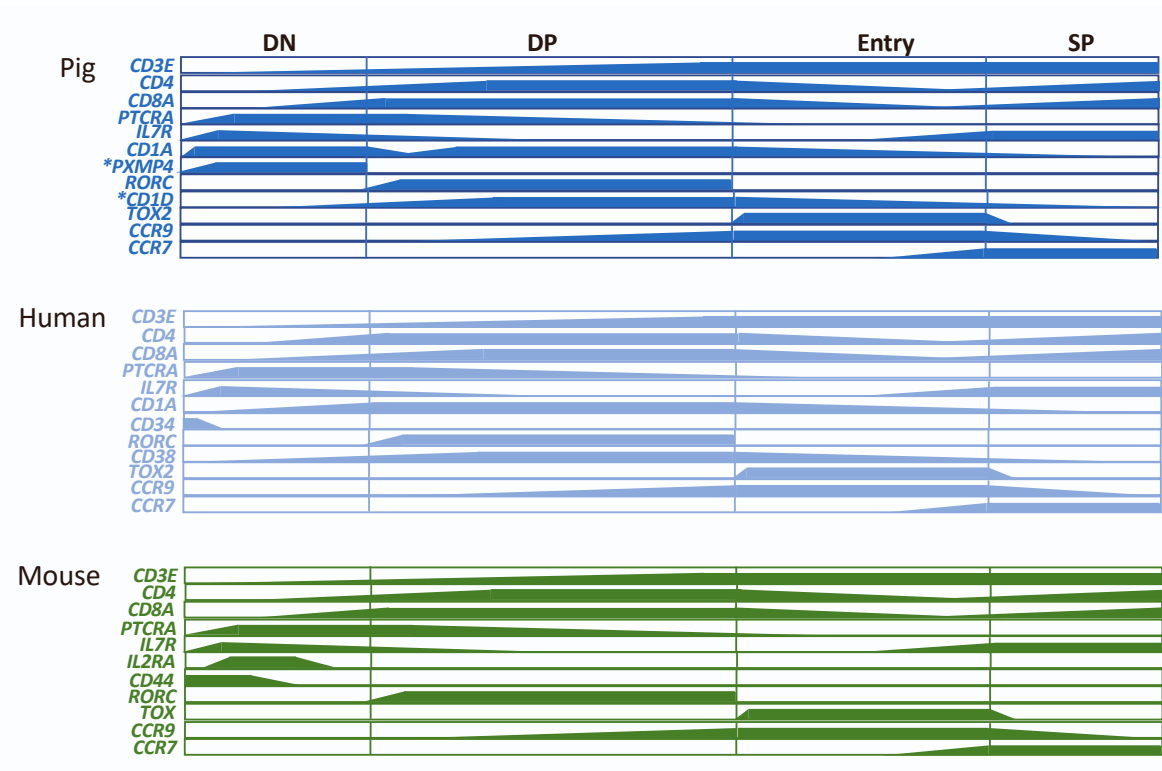

**Figure S7. Stage-specific patterns of classical thymocyte development markers in pigs, humans, and mice, related to Figures 1 and 4.**



**Table S13.** Non-annotated genes, related to Figures 1-7, S1, S2, S4, and S5. For genes displayed in the text/figures that were not annotated in the Sscrofa 11.1 reference genome, we replaced the original Ensembl IDs with the most recent available gene symbol or gene description in NCBI (<https://www.ncbi.nlm.nih.gov/gene/>) or the homologous human or mouse gene symbol from Ensembl (<https://www.ensembl.org/biomart/martview/>). The gene annotated as *HLA-DRA* was converted to the pig-specific gene symbol *SLA-DRA*.

| <b>Ensembl IDs</b> | <b>Replaced gene symbol</b>                                                                            |
|--------------------|--------------------------------------------------------------------------------------------------------|
| ENSSSCG00000026217 | KLRD1                                                                                                  |
| ENSSSCG00000038351 | TNFRSF18                                                                                               |
| ENSSSCG00000036618 | FCGR3A                                                                                                 |
| ENSSSCG00000005095 | PRKCH                                                                                                  |
| ENSSSCG00000034625 | PXMP4                                                                                                  |
| ENSSSCG00000006452 | CD1D                                                                                                   |
| ENSSSCG00000025644 | CD1A                                                                                                   |
| ENSSSCG00000009240 | PLAC8                                                                                                  |
| ENSSSCG00000033465 | HIVEP3                                                                                                 |
| ENSSSCG00000032810 | GZMM                                                                                                   |
| ENSSSCG00000009746 | RAN                                                                                                    |
| ENSSSCG00000029668 | IL2RB                                                                                                  |
| ENSSSCG00000029596 | T-cell receptor gamma chain C region 1-like<br>(TRGC1) (homologous to human TRGV10 and<br>mouse Trgc4) |
| ENSSSCG00000023584 | T-cell receptor gamma-2 chain C region-like<br>(TRGC2) (homologous to human TRGV9)                     |
| ENSSSCG00000001229 | SLA-2                                                                                                  |
| ENSSSCG00000033909 | GIMAP1                                                                                                 |
| ENSSSCG00000001396 | SLA-8                                                                                                  |
| ENSSSCG00000037364 | CD7                                                                                                    |
| ENSSSCG00000022322 | BCL2L11                                                                                                |
| ENSSSCG00000016737 | PPIA                                                                                                   |
| ENSSSCG00000021591 | RBM3                                                                                                   |

ENSSSCG00000020808 CCT6A  
ENSSSCG00000011676 ATP1B3  
ENSSSCG00000014031 HNRNPAB  
ENSSSCG00000037142 CRIP1  
ENSSSCG00000014565 IFITM1  
ENSSSCG00000024973 GBP1  
ENSSSCG00000048323 CD99  
ENSSSCG00000008898 HOPX  
ENSSSCG00000034914 CD163L1 (also known as WC1)  
ENSSSCG00000031085 Antigen WC1.1  
ENSSSCG00000008032 Prss34  
ENSSSCG00000033734 TMSB4Y  
ENSSSCG00000012178 Eif2s3y  
ENSSSCG00000031023 Cd24a  
ENSSSCG00000032591 IFITM1-like  
ENSSSCG00000014540 FTH1  
ENSSSCG00000010077 IGLL1  
ENSSSCG00000033550 Histone domain-containing protein  
ENSSSCG00000033451 Histone H2A type 1  
ENSSSCG00000003236 SIGLEC5/ SIGLEC14  
ENSSSCG00000036224 IGKC  
ENSSSCG00000001455 SLA-DRB1  
ENSSSCG00000037775 IGHM  
ENSSSCG00000014997 CASP4  
ENSSSCG00000027196 GIMAP6  
HLA-DRA SLA-DRA
